# Supplementary material for: Targeting type I interferon (IFN) signalling in patients with RA with a high type I IFN gene signature
Source: PubMed Central journal article supplement — RMD Open. 2022 Oct 21;8(2):e002525. doi: 10.1136/rmdopen-2022-002525 (PMC9594563; doi:10.1136/rmdopen-2022-002525), 2022-10-21
Supplement: rmdopen-2022-002525supp002.pdf [file rmdopen-2022-002525supp002.pdf]

| Characteristics            | All (n=16)  | IFN neg. (n=8) | IFN pos. (n=8) |
|----------------------------|-------------|----------------|----------------|
| Female sex, no. (%)        | 12 (75%)    | 6 (75%)        | 6 (75%)        |
| Age, year                  | 55.8±10.1   | 59.3±7.5       | 52.4±11.7      |
| Swollen joints, no.        | 5.4±2.0     | 4.9±1.5        | 6.0±2.3        |
| Tender joints, no.         | 12.0±10.0   | 6.4±3.6        | 17.6±11.4      |
| CDAI                       | 26.7±13.7   | 18.0±5.9       | 34.3±14.2      |
| SDAI                       | 28.0±14.2   | 19.0±6.5       | 35.9±14.7      |
| CRP (mg/dl)                | 1.3±1.0     | 1.1±1.2        | 1.6±0.8        |
| ESR (mm/hour)              | 21.6±24.1   | 16.4±21.0      | 27.6±27.6      |
| CRP/ESR ratio              | 0.07±0.06   | 0.05±0.06      | 0.09±0.05      |
| RF positive, no. (%)       | 12 (75%)    | 6 (75%)        | 6 (75%)        |
| RF (IU/ml)                 | 150.6±246.5 | 109.4±235.7    | 191.0±266.0    |
| Anti-CCP positive, no. (%) | 10 (63%)    | 4 (50%)        | 6 (75%)        |
| Anti-CCP (U/ml)            | 206.7±164.1 | 167.4±176.3    | 246.0±151.9    |

**Supplementary Table 1**

Demographic and clinical characteristics of patients at screening. Only data of first screening visit are shown. Unless other stated, data show mean±SD.

Abbreviations: anti-CCP, Anti-cyclic citrullinated peptide antibody; CDAI, clinical disease activity index; CRP, C-reactive protein; DAS28, disease activity score 28; ESR, erythrocyte sedimentation rate; no., number; SDAI, simplified disease activity index; RF, rheumatoid factor;
