# Supplementary material for: Targeting type I interferon (IFN) signalling in patients with RA with a high type I IFN gene signature
Source: PubMed Central journal article supplement — RMD Open. 2022 Oct 21;8(2):e002525. doi: 10.1136/rmdopen-2022-002525 (PMC9594563; doi:10.1136/rmdopen-2022-002525), 2022-10-21
Supplement: rmdopen-2022-002525supp003.pdf [file rmdopen-2022-002525supp003.pdf]

| Variable           | Baseline | Week.4 | Week.8 | Week.12 | Week.16 | Week.20 | Week.24 |
|--------------------|----------|--------|--------|---------|---------|---------|---------|
| <b>CDAI</b>        |          |        |        |         |         |         |         |
| <b>All</b>         |          |        |        |         |         |         |         |
| N                  | 7        | 6      | 5      | 3       | 3       | 2       | 2       |
| Mean               | 37.829   | 30.917 | 26.3   | 16.3    | 25.167  | 17.7    | 18.1    |
| Std. Dev.          | 13.757   | 11.062 | 10.774 | 6.065   | 10.721  | 6.364   | 5.515   |
| Min                | 17.7     | 18     | 13.5   | 10      | 16.1    | 13.2    | 14.2    |
| 1st Qu.            | 32.45    | 22.05  | 19.9   | 13.4    | 19.25   | 15.45   | 16.15   |
| Median             | 34       | 30.5   | 25.1   | 16.8    | 22.4    | 17.7    | 18.1    |
| 3rd Qu.            | 42.95    | 39.325 | 31.5   | 19.45   | 29.7    | 19.95   | 20.05   |
| Max                | 62.3     | 45     | 41.5   | 22.1    | 37      | 22.2    | 22      |
| <b>Anifrolumab</b> |          |        |        |         |         |         |         |
| N                  | 4        | 3      | 2      | 1       | 1       | 1       | 1       |
| Mean               | 43.55    | 27.9   | 22.5   | 16.8    | 22.4    | 13.2    | 14.2    |
| Std. Dev.          | 13.343   | 11.49  | 12.728 | NA      | NA      | NA      | NA      |
| Min                | 34       | 18     | 13.5   | 16.8    | 22.4    | 13.2    | 14.2    |
| 1st Qu.            | 34       | 21.6   | 18     | 16.8    | 22.4    | 13.2    | 14.2    |
| Median             | 38.95    | 25.2   | 22.5   | 16.8    | 22.4    | 13.2    | 14.2    |
| 3rd Qu.            | 48.5     | 32.85  | 27     | 16.8    | 22.4    | 13.2    | 14.2    |
| Max                | 62.3     | 40.5   | 31.5   | 16.8    | 22.4    | 13.2    | 14.2    |
| <b>Placebo</b>     |          |        |        |         |         |         |         |
| N                  | 3        | 3      | 3      | 2       | 2       | 1       | 1       |
| Mean               | 30.2     | 33.933 | 28.833 | 16.05   | 26.55   | 22.2    | 22      |
| Std. Dev.          | 12.165   | 12.108 | 11.274 | 8.556   | 14.779  | NA      | NA      |
| Min                | 17.7     | 21     | 19.9   | 10      | 16.1    | 22.2    | 22      |
| 1st Qu.            | 24.3     | 28.4   | 22.5   | 13.025  | 21.325  | 22.2    | 22      |
| Median             | 30.9     | 35.8   | 25.1   | 16.05   | 26.55   | 22.2    | 22      |
| 3rd Qu.            | 36.45    | 40.4   | 33.3   | 19.075  | 31.775  | 22.2    | 22      |
| Max                | 42       | 45     | 41.5   | 22.1    | 37      | 22.2    | 22      |

**Supplementary Table 2**

Descriptive statistics for CDAI at each time point over the course of the study.
