# Supplementary material for: Targeting type I interferon (IFN) signalling in patients with RA with a high type I IFN gene signature
Source: PubMed Central journal article supplement — RMD Open. 2022 Oct 21;8(2):e002525. doi: 10.1136/rmdopen-2022-002525 (PMC9594563; doi:10.1136/rmdopen-2022-002525), 2022-10-21
Supplement: rmdopen-2022-002525supp004.pdf [file rmdopen-2022-002525supp004.pdf]

| Variable           | Baseline | Week.4 | Week.8 | Week.12 | Week.16 | Week.20 | Week.24 |
|--------------------|----------|--------|--------|---------|---------|---------|---------|
| <b>SDAI</b>        |          |        |        |         |         |         |         |
| <b>All</b>         |          |        |        |         |         |         |         |
| N                  | 7        | 6      | 5      | 3       | 3       | 2       | 2       |
| Mean               | 39.876   | 32.187 | 26.746 | 17.107  | 25.313  | 17.825  | 18.715  |
| Std. Dev.          | 15.878   | 11.921 | 10.455 | 5.04    | 10.777  | 6.413   | 4.83    |
| Min                | 17.87    | 18.37  | 14.03  | 12.1    | 16.18   | 13.29   | 15.3    |
| 1st Qu.            | 33.44    | 22.425 | 20.01  | 14.57   | 19.37   | 15.557  | 17.008  |
| Median             | 37.1     | 31.605 | 26.75  | 17.04   | 22.56   | 17.825  | 18.715  |
| 3rd Qu.            | 43.68    | 42.382 | 31.94  | 19.61   | 29.88   | 20.093  | 20.422  |
| Max                | 69.92    | 46.2   | 41     | 22.18   | 37.2    | 22.36   | 22.13   |
| <b>Anifrolumab</b> |          |        |        |         |         |         |         |
| N                  | 4        | 3      | 2      | 1       | 1       | 1       | 1       |
| Mean               | 46.66    | 29.657 | 22.985 | 17.04   | 22.56   | 13.29   | 15.3    |
| Std. Dev.          | 16.139   | 13.24  | 12.664 | NA      | NA      | NA      | NA      |
| Min                | 34.56    | 18.37  | 14.03  | 17.04   | 22.56   | 13.29   | 15.3    |
| 1st Qu.            | 36.465   | 22.37  | 18.508 | 17.04   | 22.56   | 13.29   | 15.3    |
| Median             | 41.08    | 26.37  | 22.985 | 17.04   | 22.56   | 13.29   | 15.3    |
| 3rd Qu.            | 51.275   | 35.3   | 27.463 | 17.04   | 22.56   | 13.29   | 15.3    |
| Max                | 69.92    | 44.23  | 31.94  | 17.04   | 22.56   | 13.29   | 15.3    |
| <b>Placebo</b>     |          |        |        |         |         |         |         |
| N                  | 3        | 3      | 3      | 2       | 2       | 1       | 1       |
| Mean               | 30.83    | 34.717 | 29.253 | 17.14   | 26.69   | 22.36   | 22.13   |
| Std. Dev.          | 12.283   | 12.679 | 10.717 | 7.128   | 14.863  | NA      | NA      |
| Min                | 17.87    | 21.11  | 20.01  | 12.1    | 16.18   | 22.36   | 22.13   |
| 1st Qu.            | 25.095   | 28.975 | 23.38  | 14.62   | 21.435  | 22.36   | 22.13   |
| Median             | 32.32    | 36.84  | 26.75  | 17.14   | 26.69   | 22.36   | 22.13   |
| 3rd Qu.            | 37.31    | 41.52  | 33.875 | 19.66   | 31.945  | 22.36   | 22.13   |
| Max                | 42.3     | 46.2   | 41     | 22.18   | 37.2    | 22.36   | 22.13   |

**Supplementary Table 3**

Descriptive statistics for SDAI at each time point over the course of the study.
