# Supplementary material for: Targeting type I interferon (IFN) signalling in patients with RA with a high type I IFN gene signature
Source: PubMed Central journal article supplement — RMD Open. 2022 Oct 21;8(2):e002525. doi: 10.1136/rmdopen-2022-002525 (PMC9594563; doi:10.1136/rmdopen-2022-002525), 2022-10-21
Supplement: rmdopen-2022-002525supp005.pdf [file rmdopen-2022-002525supp005.pdf]

| Pat. ID | Treatment   | Adverse event                    | AESI | SAE | Severity |
|---------|-------------|----------------------------------|------|-----|----------|
| 1       | Anifrolumab | throat pain                      | no   | no  | mild     |
|         |             | skin rash (hypersensitivity)     | no   | no  | moderate |
|         |             | head ache                        | no   | no  | mild     |
| 2       | Placebo     | ear ache                         | no   | no  | mild     |
|         |             | ischemia left arm                | no   | yes | severe   |
| 3       | Placebo     | episcleritis                     | no   | no  | mild     |
|         |             | coughing                         | no   | no  | mild     |
| 4       | Anifrolumab | nausea                           | no   | no  | mild     |
|         |             | worsening joint pain             | no   | no  | mild     |
| 5       | Anifrolumab | none                             | no   | no  | mild     |
| 6       | Anifrolumab | exacerbation of bronchial asthma | no   | yes | severe   |
| 7       | Placebo     | gastric ulcer                    | no   | no  | mild     |
|         |             | worsening rheumatoid nodules     | no   | no  | mild     |
|         |             |                                  |      |     |          |

**Supplementary Table 4**

Adverse events (AEs), serious adverse event (SAE) and adverse event of special interest (AESI).
