# Supplementary figures and images for: Targeting type I interferon (IFN) signalling in patients with RA with a high type I IFN gene signature
Source: PubMed Central journal article supplement — RMD Open. 2022 Oct 21;8(2):e002525. doi: 10.1136/rmdopen-2022-002525 (PMC9594563; doi:10.1136/rmdopen-2022-002525), 2022-10-21

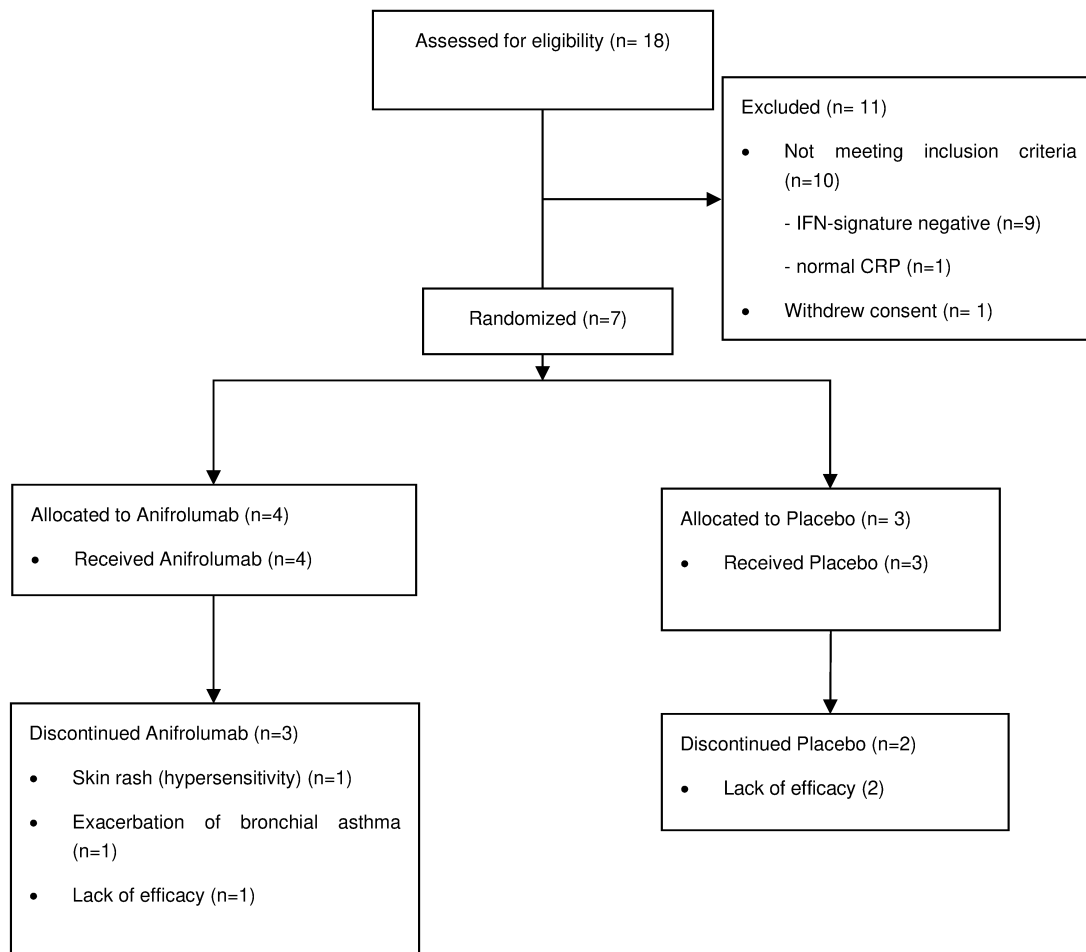

**Supplementary Figure 1**  
Disposition of patients.

Supplement: rmdopen-2022-002525supp001.pdf [file rmdopen-2022-002525supp001.pdf]
